# Supplementary material
Source: MDPI journal article supplement (https://www.mdpi.com/2073-4395/11/10/1914)
Supplement: s1 [file s1]

**Table S1.** Date and climate information of sampling and treatment days.

| Date            | Average temperature | Precipitation | Sampling                        |
|-----------------|---------------------|---------------|---------------------------------|
| 2021, April, 5  | 8.0°C               | 0.0 mm        | One day before FCG treatment    |
| 2021, April, 6  | 11.8°C              | 0.0 mm        | FCG treatment                   |
| 2021, April, 7  | 14.5°C              | 0.0 mm        | One day after FCG treatment     |
| 2021, April, 9  | 7.3°C               | 0.2 mm        | Three days after FCG treatment  |
| 2021, April, 13 | 14.9°C              | 0.1 mm        | One week after FCG treatment    |
| 2021, April, 20 | 17.3°C              | 0.0 mm        | Two weeks after FCG treatment   |
| 2021, April, 27 | 14.7°C              | 0.0 mm        | Three weeks after FCG treatment |

This supplementary table provides the climate information of treatment and sampling dates.

Table S2. The list of FCG core family and manure core family

| <b>FCG core family</b>    | <b>Manure core family</b>       |
|---------------------------|---------------------------------|
| <i>Bacillaceae</i>        | <i>Bacteroidaceae</i>           |
| <i>Moraxellaceae</i>      | <i>Muribaculaceae</i>           |
| <i>Pseudomonadaceae</i>   | <i>Prevotellaceae</i>           |
| <i>Rhodanobacteraceae</i> | <i>Rikenellaceae</i>            |
|                           | <i>Uncultured_Bacteroidales</i> |
|                           | <i>RF39</i>                     |
|                           | <i>Unclassified_Clostridia</i>  |
|                           | <i>Christensenellaceae</i>      |
|                           | <i>Clostridia_UCG-014</i>       |
|                           | <i>Lachnospiraceae</i>          |
|                           | <i>Monoglobaceae</i>            |
|                           | <i>Butyricicoccaceae</i>        |
|                           | <i>Oscillospiraceae</i>         |
|                           | <i>Ruminocococcaceae</i>        |
|                           | <i>UCG-010</i>                  |
|                           | <i>Eubacterium</i>              |
|                           | <i>Peptostreptococcaceae</i>    |
|                           | <i>Akkermensia</i>              |
| <b>Total 4 family</b>     | <b>Total 18 family</b>          |

This supplementary table provides the list of core families detected in FCG and manure.
