# Supplementary material
Source: MDPI journal article supplement (https://www.mdpi.com/2073-4395/11/10/1914)
Supplement: s1 [file s1]

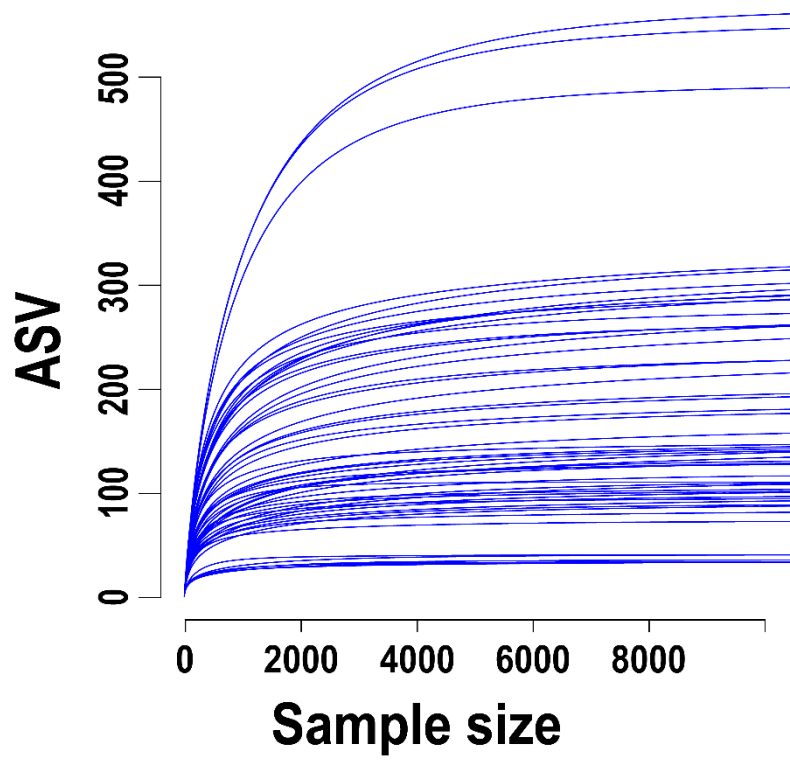

**Figure S1.** The rarefaction curve was generated on the ASV level to confirm whether our sampling could represent the original microbial consortium of samples well.
