# Supplementary material
Source: MDPI journal article supplement (https://www.mdpi.com/2073-4395/11/10/1914)
Supplement: s1 [file s1]

Archive with 2 entries (2 files):
- Figure S1.pdf
- Supplementary Tables.pdf
